# Supplementary material for: Pattern-Dependent Mammalian Cell (Vero) Morphology on Tantalum/Silicon Oxide 3D Nanocomposites
Source: MDPI journal article supplement (doi:10.3390/ma11081306), 2018-07-28
Supplement: s1 [file s1]

## Supplement figures

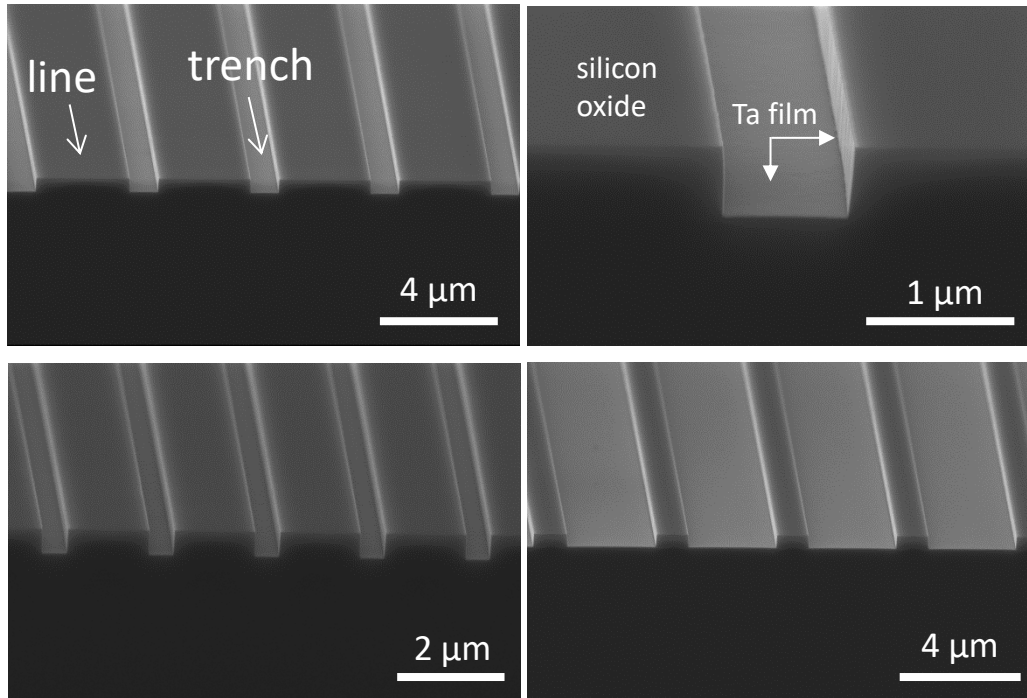

Figure S1. Typical 70° tilted SEM micrographs of cross-sectioned specimen with various line and trench widths. Sidewalls and trench bottoms are covered with tantalum film while the line top surface have silicon oxide exposed.

0.21  $\mu\text{m}$  trench, 0.5 hours of incubation

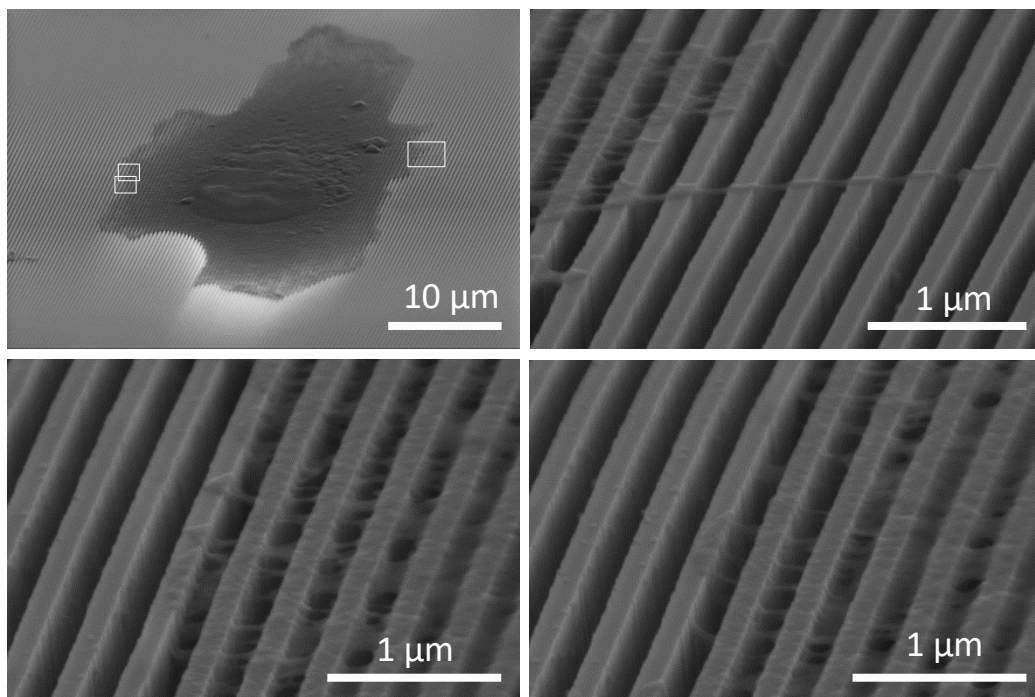

Figure S2 . Representative 70° tilted SEM micrograph of a cell incubated for 0.5 hour on a 0.21  $\mu\text{m}$  trench comb structure.

0.21  $\mu\text{m}$  trench, 0.5 hours of incubation

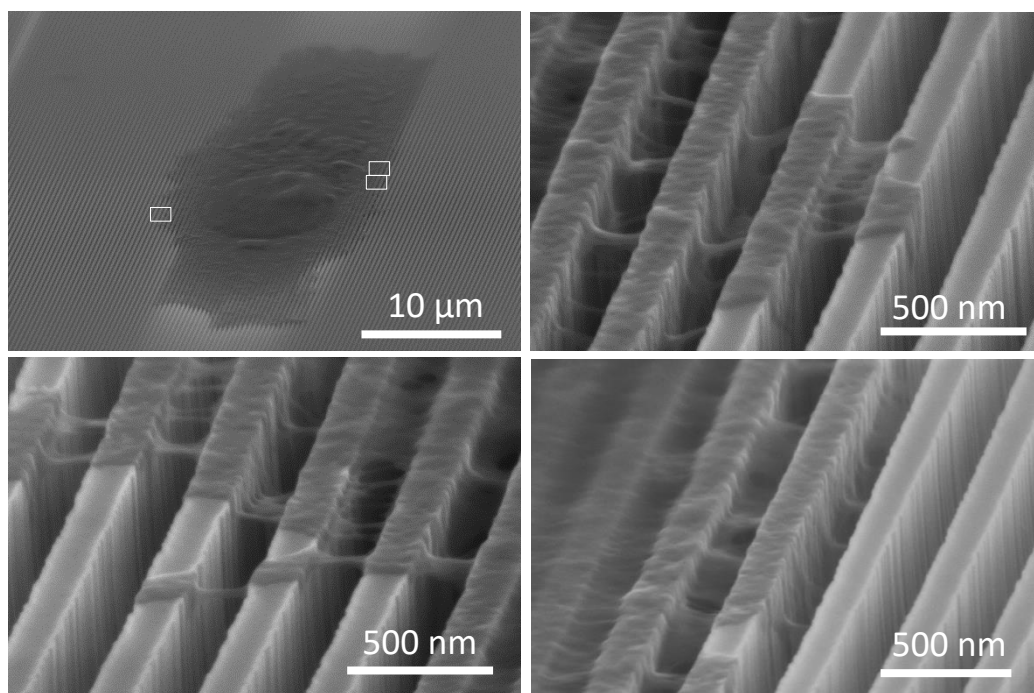

Figure S3. Representative 70° tilted SEM micrograph of a cell incubated for 0.5 hour on a 0.21  $\mu\text{m}$  comb structure.

0.21  $\mu\text{m}$  trenches, 0.5 hours incubation

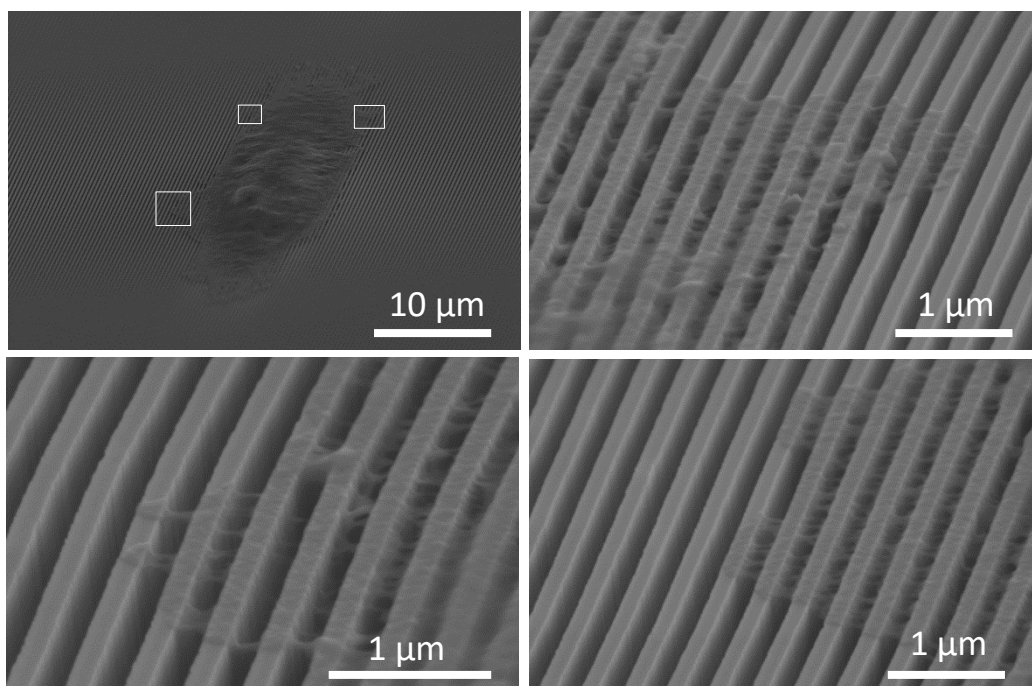

Figure S4. Representative 70° tilted SEM micrograph of a cell incubated for 0.5 hour on a 0.21  $\mu\text{m}$  comb structure.

0.26  $\mu\text{m}$  trenches, 0.5 hours incubation

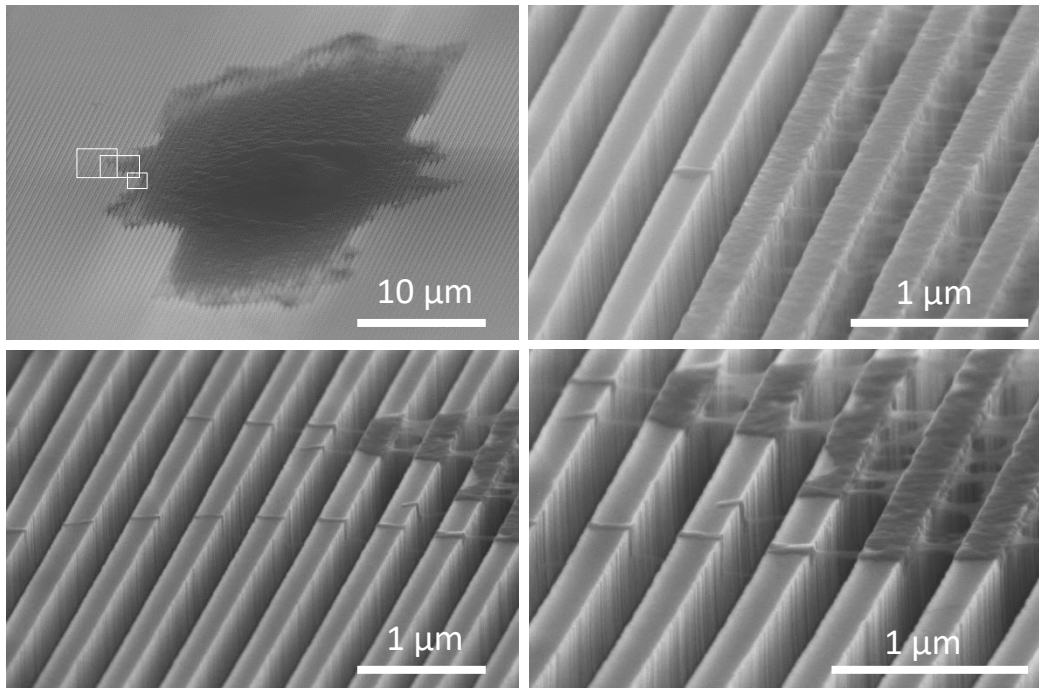

Figure S5. Representative 70° tilted SEM micrograph of a cell incubated for 0.5 hour on a 0.26  $\mu\text{m}$  comb structure.

0.26  $\mu\text{m}$  trenches, 0.5 hours incubation

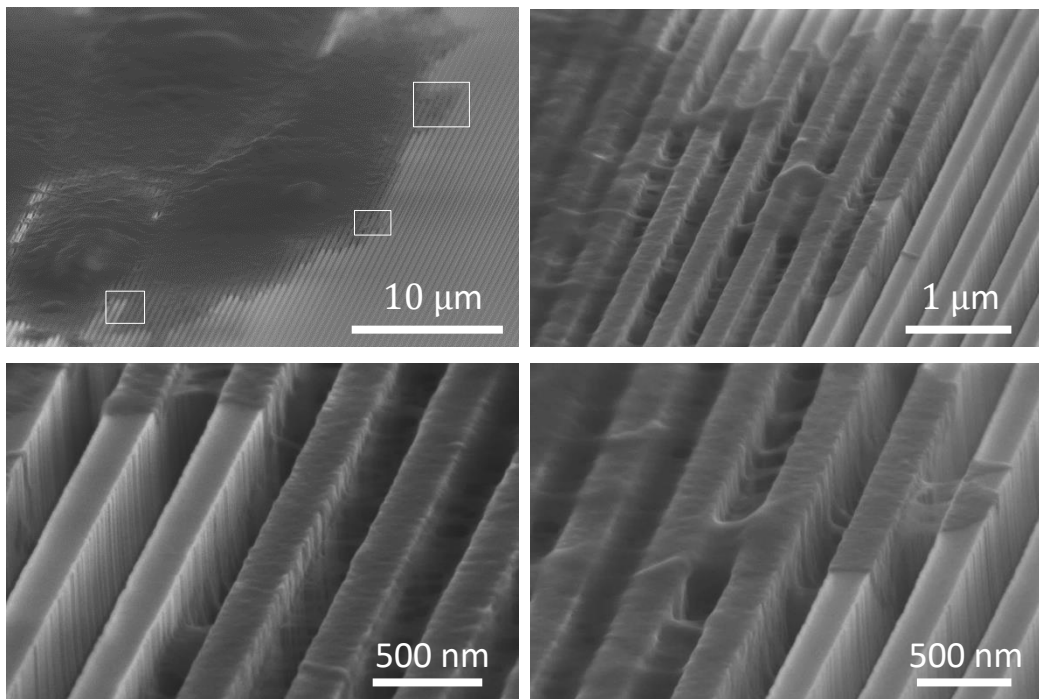

Figure S6. Representative 70° tilted SEM micrograph of a cell incubated for 0.5 hour on a 0.26  $\mu\text{m}$  comb structure.

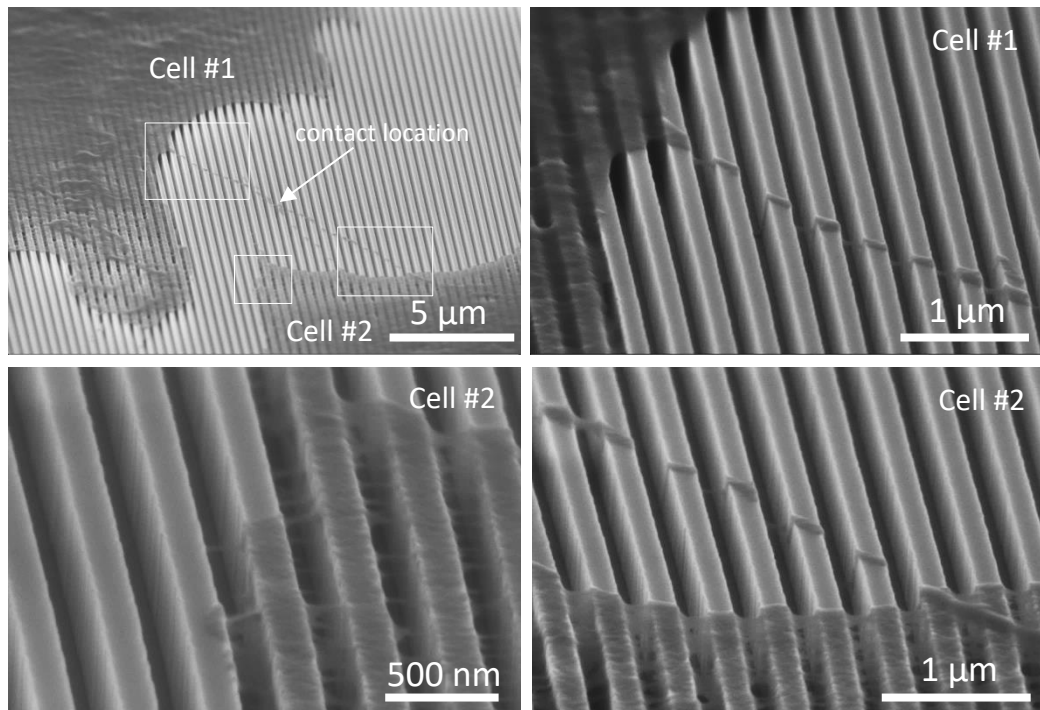

Figure S7. Representative 70° tilted SEM micrograph of a cell incubated for 24 hour on a 0.21 μm comb structure. Note filopodia extended from two different cells contacts on the dense line structure.
